# Supplementary material
Source: PubMed Central journal article supplement (PMC5865421)
Supplement: 2017_174060-Disclosures_and_Contributions.pdf [file 2017_174060-Disclosures_and_Contributions.pdf]

Haematologica  
HAEMATOL/2017/174060  
Version 3

Trametinib inhibits RAS-mutant MLL-rearranged acute lymphoblastic leukemia at specific niche sites and reduces ERK phosphorylation in vivo

Mark Kerstjens, Sandra S. Pinhancos, Patricia Garrido Castro, Pauline Schneider, Priscilla Wander, Rob Pieters, and Ronald W. Stam

Disclosures: This work was supported by funding from KIKa (Stichting Kinderen Kankervrij). Additionally, this work was supported through use of imaging equipment of the Applied Molecular Imaging Erasmus MC facility. The authors have no competing interests to disclose.

Contributions: MK designed, performed, analyzed and interpreted the experiments and data and wrote the manuscript. SMP and PGC performed experiments, and analyzed data. PS and PW performed experiments. RP and RWS designed research, interpreted data and revised the manuscript.
